# Supplementary material
Source: PubMed Central journal article supplement (PMC1622802)

### Untutored bird (ID#56)

PH47

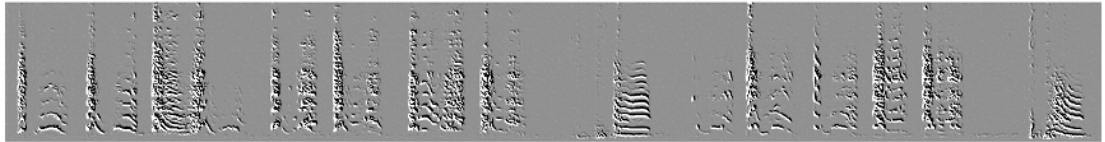

PH48  
(sacrificed)

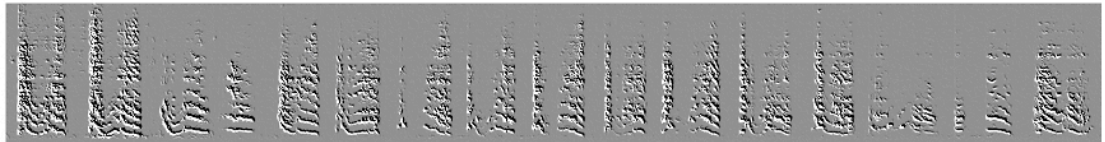

### Tutored bird (ID#53)

PH40  
(training  
starts)

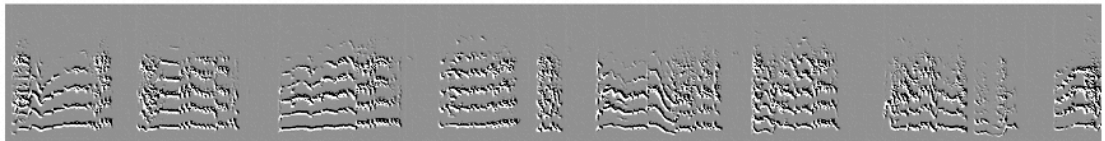

PH42

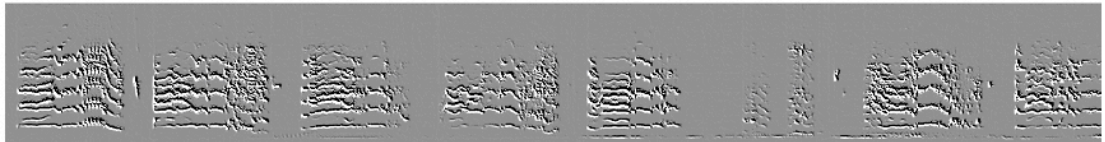

PH43

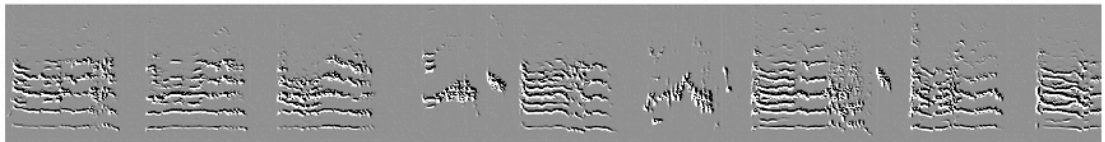

PH48  
(sacrificed)

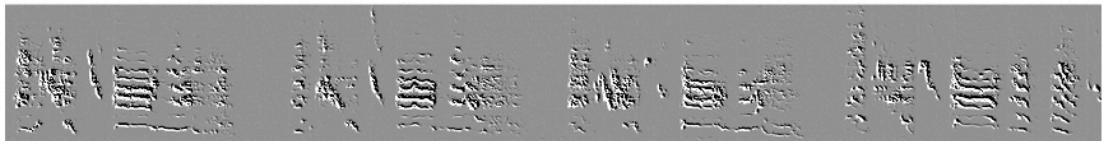

### Tutor song SAMBA

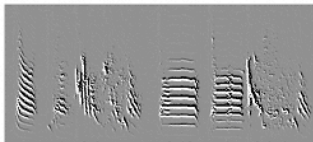

Supplement: pnas_0607098103_3.pdf [file pnas_0607098103_3.pdf]
