# Supplementary material
Source: PubMed Central journal article supplement (PMC1622802)
Supplement: pnas_0607098103_5.pdf [file pnas_0607098103_5.pdf]

## Songbird Brain Transcriptome Database

cDNA List

Gene Ontology Browser

BLAST Search

Home

Query Level:

Cluster

help

Advanced search

Library info

Jarvis Lab

Frequently Asked Questions (FAQ)

Project Collaborators/ Funding

Annotator Login

Cluster: H3 histone, family 3B ( view this cluster in [cluster](#), [align](#) - or all clones in [cluster](#), [align](#) )3 subclusters, 18 clones [View cluster evidence \(6 blasts\)](#)

▼ cluster: H3 histone, family 3B (zebra finch)

14 clones [View subcluster evidence \(182 blasts\)](#)

▼ subcluster: H3 histone, family 3B, variant 1 (zebra finch)

- ▶ [clone\\_0061P0023D06](#): H3 histone, family 3B, variant 1, complete cds (zebra finch)
- ▶ [clone\\_0058P0008A11](#): H3 histone, family 3B, variant 1, complete cds (zebra finch)
- ▶ [clone\\_0058P0008G10](#): H3 histone, family 3B, variant 1, complete cds (zebra finch)
- ▶ [clone\\_0065P0013G06](#): H3 histone, family 3B, variant 1, complete cds (zebra finch)
- ▶ [clone\\_0063P0009E07](#): H3 histone, family 3B, variant 1, complete cds (zebra finch)
- ▶ [clone\\_0058P0044A07](#): H3 histone, family 3B, variant 1, complete cds (zebra finch)
- ▶ [clone\\_0058P0008F10](#): H3 histone, family 3B, variant 1, complete cds (zebra finch)
- ▶ [clone\\_0058P0020G11](#): H3 histone, family 3B, variant 1, complete cds (zebra finch)
- ▶ [clone\\_0058P0008B11](#): H3 histone, family 3B, variant 1, complete cds (zebra finch)
- ▶ [clone\\_0063P0006D07](#): H3 histone, family 3B, variant 1, complete cds (zebra finch)
- ▶ [clone\\_0058P0006E06](#): H3 histone, family 3B, variant 1, complete cds (zebra finch)
- ▶ [clone\\_0061P0016F11](#): H3 histone, family 3B, variant 1, complete cds (zebra finch)
- ▶ [clone\\_0058P0018B10](#): H3 histone, family 3B, variant 1, complete cds (zebra finch)
- ▶ [clone\\_0058P0050F10](#): H3 histone, family 3B, variant 1, complete cds (zebra finch)

3 clones [View subcluster evidence \(6 blasts\)](#)

▼ subcluster: H3 histone, family 3B, variant 2 (zebra finch)

- ▶ [clone\\_0065P0009F02](#): H3 histone, family 3B, variant 2, complete cds (zebra finch)
- ▶ [clone\\_0063P0002B04](#): H3 histone, family 3B, variant 2, complete cds (zebra finch)
- ▶ [clone\\_0063P0003D04](#): H3 histone, family 3B, variant 2, complete cds (zebra finch)

1 clone

▼ subcluster: H3 histone, family 3B, variant 3 (zebra finch)

- ▶ [clone\\_0061P0006D04](#): H3 histone, family 3B, variant 3, complete cds (zebra finch)

## Primer annotations:

Species: zebra finch (18)

Tissues: whole brain (18)

Ages: PH86 (3); adult (5); PH10 (1); PH64 (2); PH47 (6)

Sexes: M (17)

Subject IDs: 31 (3); 45 (4); 56 (2); 40 (1); 13 (1); 54 (6)

Conditions: silence-male (3); development (1); sleep (4); seizure (1); learning (8)

Details: sleep 2hr (4); juvenile rapid vocal learning minus juvenile singing control (4); seizure-kainate receptor activation 0.5h (1); silent male minus hearing female (3); post hatch development (1); rapid vocal learning-afternoon 7th day (2); juvenile rapid vocal learning minus adult singers 2hr,6hr (2)

Aviaries: Jarvis-Duke (5); Sakaguchi-Tokyo (4); Tchernichovski-CUNY (8)

Library numbers: 0058 (9); 0065 (2); 0063 (4); 0061 (3)

Library conditions: Single male minus single female (3); Single juvenile learning minus 2 adult male singers (2); 50 mix pooled juveniles + adults (9); Single juvenile learning minus single juvenile untutored (4)

Library types: subtracted (9); normalized (9)

Investigators: Wada, Jarvis, Lints

## Database Sequence Searches:

NCBI nucleotide nr: [91 total blast hits](#) (10/19/2004)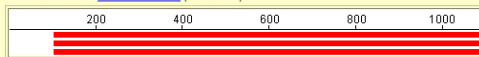NCBI protein nr: [100 total blast hits](#) (11/29/2004)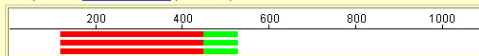Tigr chicken: [20 total blast hits](#) (10/20/2004)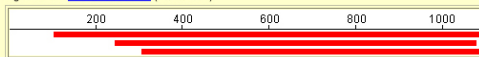Chicken transcriptome: [2 total blast hits](#) (10/20/2004)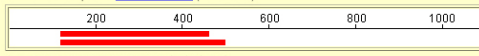Chicken genome: [4 total blast hits](#) (10/22/2004)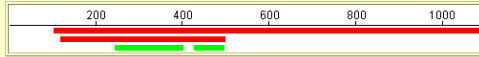ESTIMA zebrafinch database: [66 total blast hits](#) (1/25/2005)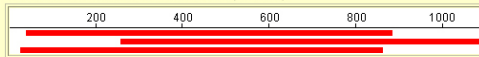D [Hs\\_180877](#): H3 histone, family 3B (H3.3B)LocusLink: [H3F3B](#)

Histones are basic nuclear proteins that are responsible for the nucleosome structure of the chromosomal fiber in eukaryotes. Two molecules of each of the four core histones (H2A, H2B, H3, and H4) form an octamer, around which approximately 146 bp of DNA is wrapped in repeating units, called nucleosomes. The linker histone, H1, interacts with linker DNA between nucleosomes and functions in the compaction of chromatin into higher order structures. This gene contains introns and its mRNA is polyadenylated, unlike most histone genes. The protein encoded is a member of the histone H3 family.

## Annotated gene ontology:

## molecular\_function

DNA binding

molecular\_function unknown

## biological\_process

biological\_process unknown

chromosome organization and biogenesis (sensu Eukarya)

nucleosome assembly

## cellular\_component

chromosome

nucleosome

nucleus

cellular\_component unknown

Annotator's note: Variant 1 has unique deletion in the ORF compared to variant 2. Variant 3 has a long 5' UTR

C Consensus Clone Sequence: (GenBank accession #: [DQ217322](#)) [fasta format](#)

```

1 ggcagctggcggcgccgctgaagagcggctcagtagcggcagcggctaaaagcttcggcggcagcggcaccggcggcctctctctctcc 100
101 tacggctgaagtggagaaaaatggccggtacaaaagcagaccgcccgaagtcacctgggggaaggcgcggcgaagcagctggcgaagggcggcgg 200
201 aaaagcggccctccacggcgggtcaagaaagctccacggctcaagcggggaacggctggcctcggctggagatccggcttaaccaaaatccacggagc 300
301 tgcgtaccgcaagctgcccctccacggcggctggcaggaaatcgcccagaagcttcaaaaacagactggaggtccagagcggggccatcggggctccga 400
401 ggagccagcagcaggatattctgggggtctgttgaagacacaaaacctggtgcccctccacgaagagatcaccatcgcccacaagatataccagct 500
501 ggctcagagatagcggggagagagggttaagtgagggtctgttctatgggtcttctgtagtaattctgtaaaaactcttggttttaatttgagcttt 600
601 tttgtaagaattgtttataatattgtgacttgaacttaagtcaactcaactcttcaactcagatgaatgtaaaagtgactttcaacataaacctcag 700
701 gatgctcagctcagctcaggatgacagactgcttaattatgagaagggatggggctctctctctctctctctctctctctctctctctctctctct 800
801 gttggtgatataaactcaaggtactgaactgatataatgtgcaagggtctcttggcaaaaactggtgatgactctgacccaaggttcaaacat 900
901 tggggtgtagtctgacctgcatcaactggtgcaaaatggaaactctctcagaggggaaactcaagcttcaacacagtgtaactcaagttctct 1000
1001 aaaaaactaacctggcagctatagaatacaactatgctattataatagctttttatattgtagtgcaaacatttttaaaataaatgtttacac 1100
1101 caaaaaaaaaaaaaaa 1116

```

## E Quality values for clone 0061P0023D06

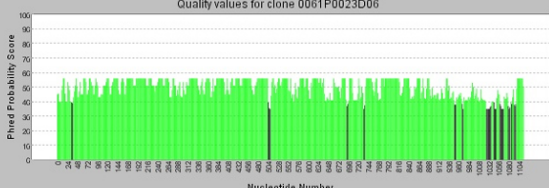

Unverified coding sequence: (bps 120 to 560, frame +3)

MARTKQTARKSTGGKAPRKLQATKAARKSAPSTGGVKKPHRYRPGTVALREIRRYQKSTELLIRKLPFQRLVREIAQDFKTLRFQSAIIGALQEASEAY  
LVGLPFDNLVCHPCQESHHAQRYPVGSQDTGREGLSEGCYGVVL\*
