# Supplementary material
Source: PubMed Central journal article supplement (PMC1622802)

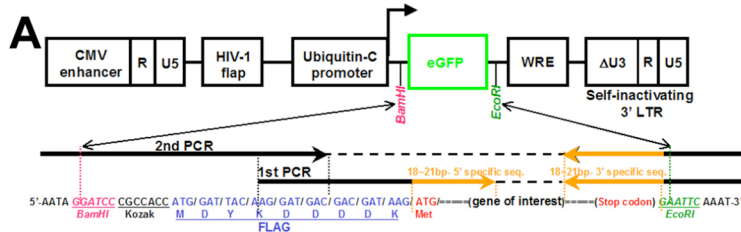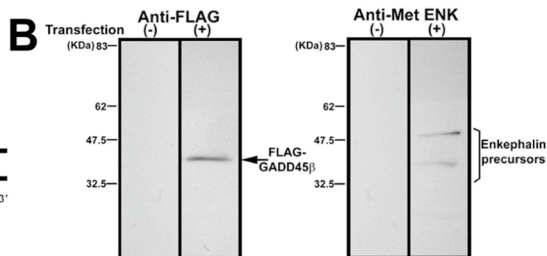

**C**

| Lentivirus promoter-gene | n= | Area X & striatum    | Time               | MAN & rostral nidopallium | Time                 | HVC & caudal nidopallium | Time    |
|--------------------------|----|----------------------|--------------------|---------------------------|----------------------|--------------------------|---------|
| EF1a-GFP                 | 6  | 2 animals (4 sites)  | 3 days and 1 week  | 2 animals (4 sites)       | 1 month and 3 months | 2 animals (4 sites)      | 1 week  |
| UbiC-GFP                 | 4  | 2 animals (4 sites)  | 1 week and 1 month | 1 animal (2 sites)        | 1 week               | 1 animal (2 sites)       | 10 days |
| CMV-GFP                  | 3  | 1 animal (2 sites)   | 10 days            | 1 animal (2 sites)        | 1 week               | 1 animal (2 sites)       | 1 week  |
| UbiC-ENK                 | 5  | 1 animal (2 sites)   | 1 week             | 2 animals (4 sites)       | 1 week and 1 month   | 2 animals (4 sites)      | 10 days |
| UbiC-GADD45β             | 3  | 2 animals (4 sites)  | 1 week and 1 month | 1 animal (2 sites)        | 1 month              | (-)                      |         |
| Total                    | 21 | 8 animals (16 sites) |                    | 7 animals (14 sites)      |                      | 6 animals (12 sites)     |         |

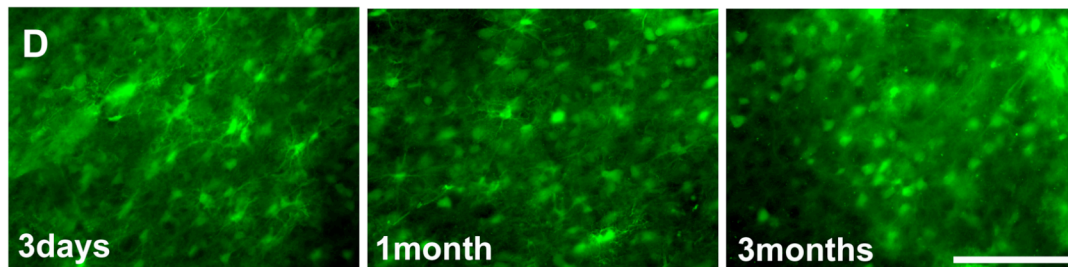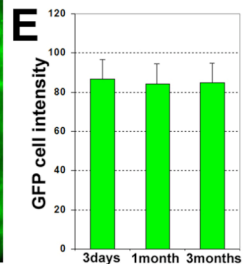

Supplement: pnas_0607098103_10.pdf [file pnas_0607098103_10.pdf]
