# Supplementary material
Source: PubMed Central journal article supplement (PMC1622802)

Use prior knowledge to select brain states that will broadly represent the brain transcriptome

Generate full-length cDNA libraries containing a broad representation of the brain transcriptome

Generate a full-length cDNA transcriptome database

Generate a custom full-length cDNA array

Use the database and array to identify behaviorally regulated genes

Use the full-length clones of the identified genes to genetically manipulate behavioral and cellular processes, to test hypotheses about brain function and disease

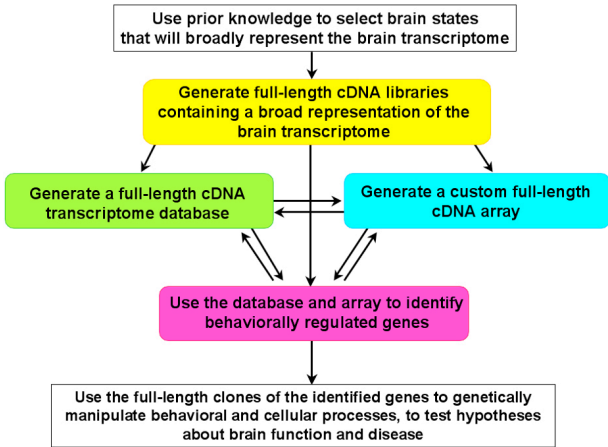

Supplement: pnas_0607098103_12.pdf [file pnas_0607098103_12.pdf]
