# Supplementary material
Source: PubMed Central journal article supplement (PMC1622802)
Supplement: pnas_0607098103_13.pdf [file pnas_0607098103_13.pdf]

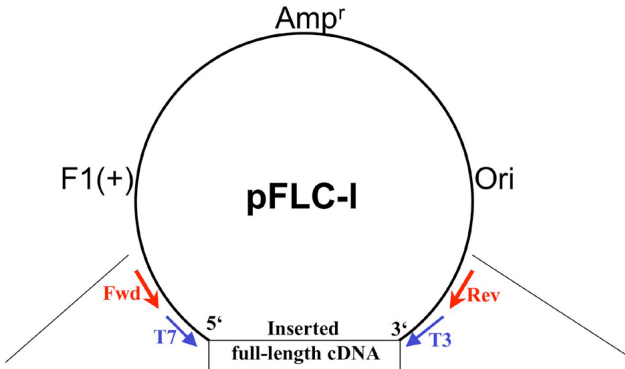

TAACGCCAGGGTTTTCCAGTCACGACGCTTGTAAAACGACGGCCAGTGAATT  
 Fwd M13-21 Primer

GTAATACGACTCACTATAGGGCGAATTGGAGCTCCACCGCGGTGGCGGCCG  
 T7 Primer

ATAACTTCGTATAGCATACATTATACGAAGTTATGGATCAGGCCAAATCGGCC  
 PLFC Fwd1 Sfi I

GAGCTCGAATTCGTCGAGCTTACACAGGTGACACACTAGAACCAG\*\*\*\*\*  
 EcoRI Avian library primer

\*\*\* 5'-{Inserted full-length cDNA}-3' \*\*\*\*\* AAAAAAAAAAAAAAAAAAAANNNNNNNTT  
 Poly (A)<sub>16</sub> 6bp unique ID

GGATCCGGCCATAAGGGCCTGATCCTTCGAGGGGGGGCCCGGTACCAGCTTT  
 BamHI Sfi I

TGTTCCCTTTAGTGAGGGTAAATTCGAGCTTGGCGTAATCATGGTCATAGCT  
 T3 Primer

GTTTCCTGTGTGAAATTGTTATCCGCTCACAATTCCACACAACATACGAGCCG  
 Rev M13 Primer
