# Supplementary material
Source: PubMed Central journal article supplement (PMC1622802)
Supplement: pnas_0607098103_15.pdf [file pnas_0607098103_15.pdf]

Table 1. Animal states used to construct libraries

| Bird ID | Individual animal brain states                                      | 3' ID   | Category                                                           | Used for libraries                       |
|---------|---------------------------------------------------------------------|---------|--------------------------------------------------------------------|------------------------------------------|
| 1       | E10 male                                                            | ACCGTT  | Embryonic development<br>(sex verified by PCR)                     | 0057                                     |
| 2       | E10 female                                                          | TATCTT  |                                                                    | 0057                                     |
| 3       | E15 male                                                            | TTGATT  |                                                                    | 0057                                     |
| 4       | E15 female                                                          | CACGGT  |                                                                    | 0057                                     |
| 5       | PH1 male                                                            | GGTCGT  |                                                                    | 0057                                     |
| 6       | PH1 female                                                          | GCACGT  |                                                                    | 0057                                     |
| 7       | PH5 male                                                            | CTGAGT  | Post hatch development<br>(sex verified by PCR)                    | 0058, 0060, 0071                         |
| 8       | PH5 female                                                          | GTCGCT  |                                                                    | 0058, 0060, 0071                         |
| 9       | PH10 male                                                           | GAGCCT  |                                                                    | 0058, 0060, 0071                         |
| 10      | PH10 female                                                         | ATTCAAT |                                                                    | 0058, 0060, 0071                         |
| 11      | PH15 male                                                           | CTCTTG  |                                                                    | 0058, 0060, 0071                         |
| 12      | PH15 female                                                         | AAGGTG  |                                                                    | 0058, 0060, 0071                         |
| 13      | PH25 male silence                                                   | GGACTG  | Sensory acquisition phase                                          | 0058, 0060, 0071                         |
| 14      | PH25 female silence                                                 | ACTATG  |                                                                    | 0058, 0060, 0071                         |
| 15      | PH25 male hearing 2hr                                               | AGCTGG  |                                                                    | 0058, 0060, 0071                         |
| 16      | PH25 female hearing 2hr                                             | TAACGG  |                                                                    | 0058, 0060, 0071                         |
| 17      | PH35 female hearing in aviary 2hr                                   | GTTAGG  | Subsong phase<br>(verified subsong prior day)                      | 0058, 0060, 0071                         |
| 18      | PH35 (subsong singer) male silence                                  | TCCTCG  |                                                                    | 0058, 0060, 0071                         |
| 19      | PH38 male undirected subsong & hearing adult song 2hr               | ATACCG  | Early plastic song phase<br>(verified plastic song prior day)      | 0058, 0060, 0071                         |
| 20      | PH55 female hearing in aviary 2hr                                   | CATACG  |                                                                    | 0058, 0060, 0071                         |
| 21      | PH55 (early plastic song singer) male silence                       | CGGACG  |                                                                    | 0058, 0060, 0071                         |
| 22      | PH54 male early plastic undirected singing & hearing adult song 2hr | GACTAG  | Late plastic song phase<br>(verified plastic song prior day)       | 0058, 0060, 0071                         |
| 23      | PH71 female hearing in aviary 2hr                                   | CCACAG  |                                                                    | 0058, 0060, 0071                         |
| 24      | PH77 (late plastic song singer) male silence                        | TGTAAG  |                                                                    | 0058, 0060, 0071                         |
| 25      | PH76 male late plastic undirected singing & hearing adult song 2hr  | ATGGTC  |                                                                    | 0058, 0060, 0071                         |
| 26      | PH88 (puberty) female hearing in aviary 2hr                         | TACCTC  | Crystallization phase<br>(verified crystallized<br>song prior day) | 0058, 0060, 0071, 0067, 0061             |
| 27      | PH86 (crystallization-puberty) male silence                         | ACACTC  |                                                                    | 0058, 0060, 0071, 0066, 0061, 0062, 0064 |
| 28      | PH86 male crystallized undirected singing & hearing adult song 2hr  | AGTATC  |                                                                    | 0058, 0060, 0071                         |
| 29      | Adult female silence, 2hr morning in soundbox                       | TGATGC  | Adult vocal communication<br>(experienced breeding birds)          | 0058, 0060, 0071                         |
| 30      | Adult male silence in soundbox 2hr morning                          | TCTAGC  |                                                                    | 0058, 0060, 0071                         |
| 31      | Adult male undirected singing & hearing adult song 30 min           | CTTACC  |                                                                    | 0058, 0060, 0071                         |
| 32      | Adult male directed singing & hearing adult song 30 min             | GAGTTA  |                                                                    | 0058, 0060, 0071                         |
| 33      | Adult female calling & hearing adult male song 2hr                  | ACGGTA  |                                                                    | 0058, 0060, 0071                         |
| 34      | Adult male undirected singing & hearing adult song 2hr              | AATTGA  |                                                                    | 0058, 0060, 0071, 0068, 0062, 0065       |
| 35      | Adult male undirected singing & hearing adult song 6hr              | TGGTGA  |                                                                    | 0058, 0060, 0071, 0068, 0062, 0065       |
| 36      | Adult 3 years old male singing undirected song 1hr                  | TAGAAT  |                                                                    | 0058, 0060, 0071                         |
| 37      | Adult male sleeping 2hr                                             | ATCGAA  | Old<br>Sleep                                                       | 0058, 0060, 0071                         |
| 38      | Adult male kainate treatment, 30min post 1st seizure                | CTAGGA  | Seizure and<br>receptor activation                                 | 0058, 0060, 0071                         |
| 39      | Adult male kainate treatment, 2hr post 1st seizure                  | CGTTCA  |                                                                    | 0058, 0060, 0071                         |
| 40      | Adult male kainate treatment, 6hr post 1st seizure                  | TACGCA  |                                                                    | 0058, 0060, 0071                         |
| 41      | Adult male apomorphin treatment, 30min post 1st seizure             | TCACCA  |                                                                    | 0058, 0060, 0071                         |
| 42      | Adult male apomorphin treatment, 2hr post 1st seizure               | GCTTAA  | Deaf                                                               | 0058, 0060, 0071                         |
| 43      | Adult male deafened                                                 | CAGCAA  |                                                                    | 0058, 0060, 0071                         |
| 44      | Adult 2.9 years old male isolated from PHD24 until adult            | AGACAA  | Isolation                                                          | 0058, 0060, 0071                         |
| 45      | PH67 male isolated from PHD25, silence                              | CCTAGT  |                                                                    | 0058, 0060, 0071                         |
| 46      | PH67 male isolated from PHD25, hearing song first time, 30 min      | TCGTAT  |                                                                    | 0058, 0060, 0071                         |
| 47      | PH120 male visually isolated from PHD25                             | CAGTCT  | Rapid vocal learning<br>(verified vocal learning<br>in real time)  | 0058, 0060, 0071, 0064                   |
| 48      | PH40 male rapid vocal learning-singing, afternoon of 1st day        | GGCACA  |                                                                    | 0058, 0060, 0071                         |
| 49      | PH52 male rapid vocal learning-singing, morning of 4th day          | GTAGAC  |                                                                    | 0058, 0060, 0071                         |
| 50      | PH47 male rapid vocal learning-singing, evening of 2nd day          | TTAGCC  |                                                                    | 0058, 0060, 0071, 0069, 0064, 0063, 0065 |
| 51      | PH38 male no motor learning yet, 1st day                            | CAAGCG  |                                                                    | 0058, 0060, 0071                         |
| 52      | PH64 male rapid vocal learning-singing, afternoon of 7th day        | GCCTGT  |                                                                    | 0058, 0060, 0071                         |
| 53      | PH48 male rapid vocal learning-singing, midday of 8th day           | GCGAGA  |                                                                    | 0058, 0060, 0071                         |
| 54      | PH51 male rapid vocal learning-singing, evening of 2nd day          | GCACAC  |                                                                    | 0058, 0060, 0071                         |
| 55      | PH44 male rapid vocal learning-singing, evening of 3rd day          | CTCCTA  | 0058, 0060, 0071                                                   |                                          |
| 56      | PH37 male no training, singing isolate subsong                      | GTCTCC  | Silent and singing<br>(used for initial library test)              | 0058, 0060, 0071, 0070                   |
| 57      | Adult male silence overnight plus 1hr in morning                    | AGGTGT  |                                                                    | 0031, 0054                               |
| 58      | Adult male directed singing to females 30min                        | AGGTGT  |                                                                    | 0033                                     |
| 59      | Adult male directed singing to females 30min                        | AGGTGT  |                                                                    | 0033                                     |
| 60      | Adult male undirected singing in aviary 40min                       | AGGTGT  |                                                                    | 0052, 0056                               |

The numbers in the left-most column indicate the number ID for each bird. Red text, age; blue text, sex; green text, amount of time stimulated or performing the specified behavior; other colored text, categories of brain states. The unique 3'-ID is the 6-bp sequence of the 3' primer used for each individual bird; the exception is that samples from birds 57-60 were used with the same primer.
