# Supplementary material
Source: PubMed Central journal article supplement (PMC1622802)
Supplement: pnas_0607098103_16.pdf [file pnas_0607098103_16.pdf]

Table 2. Zebra finch brain cDNA libraries

|    | <b>Lib</b> | <b>T</b> | <b>Condition</b>                   | <b>Bird ID</b> |
|----|------------|----------|------------------------------------|----------------|
| 1  | 0031       | N        | Silent male                        | 57             |
| 2  | 0033       | N        | Directed singing male              | 58             |
| 3  | 0052       | N        | Undirected singing males           | 59             |
| 4  | 0054       | A        | Silent male                        | 57             |
| 5  | 0055       | A        | Directed singing male              | 58             |
| 6  | 0056       | A        | Undirected singing males           | 59             |
| 7  | 0057       | N        | Embryonic males and females        | 1 to 6         |
| 8  | 0058       | N        | Juveniles/adults 50 states pooled  | 7 to 56        |
| 9  | 0059       | N        | Rapid vocal learning males         | 48 to 56       |
| 10 | 0060       | A        | Juveniles/adults 50 states pooled  | 7 to 56        |
| 11 | 0061       | S        | Silent male-Hearing female         | 27-26          |
| 12 | 0062       | S        | Adult singing males-Silent male    | 34+35-27       |
| 13 | 0063       | S        | Rapid vocal learning-Untutored     | 50-56          |
| 14 | 0064       | S        | Rapid vocal learning-Adult silent  | 50-27          |
| 15 | 0065       | S        | Rapid vocal learning-Adult singing | 50-34+35       |
| 16 | 0066       | R        | Silent male                        | 27             |
| 17 | 0067       | R        | Hearing female                     | 26             |
| 18 | 0068       | R        | Adult singing males                | 34+35          |
| 19 | 0069       | R        | Rapid vocal learning male          | 50             |
| 20 | 0070       | R        | Untutored male                     | 56             |
| 21 | 0071       | R        | Juveniles/adults 50 states pooled  | 7 to 56        |

Library (Lib) ID designated at the Duke University Center for Genome Technology. Libraries types (T) are N, normalized; A, abundant; S, subtracted; and R, regular. Bird ID, brain samples (Table 1) used to make the libraries. Silent condition means bird was not singing. Hearing condition means bird heard song playbacks.
