# Supplementary material
Source: PubMed Central journal article supplement (PMC1622802)
Supplement: pnas_0607098103_18.pdf [file pnas_0607098103_18.pdf]

Table 4. Microarray hybridizations

| Song nucleus | Replicate 1                                                          | Replicate 2 (swap)                                                   | Replicate 3                                                 | Replicate 4                                                 |
|--------------|----------------------------------------------------------------------|----------------------------------------------------------------------|-------------------------------------------------------------|-------------------------------------------------------------|
| HVC          | Green/red<br>Silent/singing (~202 bouts), $n = 3$ each group, pooled | Red/green<br>Silent/singing (~202 bouts), $n = 3$ each group, pooled | Red/green<br>Silent/singing (208 bouts), $n = 1$ each group | Poor-quality hyb                                            |
| RA           | Green/red<br>Silent/singing (~202 bouts), $n = 3$ each group, pooled | Red/green<br>Silent/singing (~202 bouts), $n = 3$ each group, pooled | Green/red<br>Silent/singing (208 bouts), $n = 1$ each group | Red/green<br>Silent/singing (151 bouts), $n = 1$ each group |
| LMAN         | Green/red<br>Silent/singing (~202 bouts), $n = 3$ each group, pooled | Red/green<br>Silent/singing (~202 bouts), $n = 3$ each group, pooled | Poor-quality hyb                                            | Red/green<br>Silent/singing (151 bouts), $n = 1$ each group |
| LAreaX       | Green/red<br>Silent/singing (~202 bouts), $n = 3$ each group, pooled | Red/green<br>Silent/singing (~202 bouts), $n = 3$ each group, pooled | Red/green<br>Silent/singing (208 bouts), $n = 1$ each group | Green/red<br>Silent/singing (151 bouts), $n = 1$ each group |

Different dye combinations were used for each of the 14 array hybridizations. In replicate 1 three animals per group were used, where dissections of silent and singing animals were separately pooled; in replicate 2, a dye swap of replicate 1 was performed; in replicates 3 and 4 one animal per group.  $n = 5$  silent and  $n = 5$  singing animals (1 h). Green, Cy3 label; Red, Cy5. Hyb, hybridization.
