# Supplementary material
Source: PubMed Central journal article supplement (PMC1622802)
Supplement: pnas_0607098103_19.pdf [file pnas_0607098103_19.pdf]

Table 5. List of 43 genes examined (41 + *egr-1* and *c-fos*), color-coded according to Fig. 2

|    | Gene name                                                                                                         | Clone ID         |
|----|-------------------------------------------------------------------------------------------------------------------|------------------|
|    | <b>Positives:</b>                                                                                                 |                  |
| 1  | <b>Early growth response 1 (<i>egr-1</i>)</b>                                                                     | Positive control |
| 2  | <b>Cellular-fos (<i>c-fos</i>), variant 2</b>                                                                     | 0033P0001H05     |
| 3  | <b>Cellular-jun (<i>c-jun</i>), variant 1</b>                                                                     | 0063P0031G06     |
| 4  | <b>Similar to jun B (<i>sim junB</i>)</b>                                                                         | 0058P0018G01     |
| 5  | Activating transcription factor 4 ( <i>ATF4</i> ), variant 1                                                      | 0065P0006B05     |
| 6  | <b>Heat shock protein binding protein 1 (<i>Hsbp1</i>), variant 2</b>                                             | 0065P0001A03     |
| 7  | Ubiquitin-conjugating E2 variant 1 ( <i>Ube2v1</i> )                                                              | 0061P0003C04     |
| 8  | Heterogeneous nuclear ribonucleoprotein H3 ( <i>HnrpH3</i> ), variant 1                                           | 0064P0008B02     |
| 9  | H3 histone, family 3B ( <i>H3f3B</i> ), variant 1                                                                 | 0058P0006E06     |
| 10 | H2A histone, family X ( <i>H2AFX</i> ), variant 1                                                                 | 0061P0021G07     |
| 11 | Split hand/foot deleted gene 1, short clone ( <i>Shfdg1</i> ), polyA                                              | 0064P0001B06     |
| 12 | Mothers against DPP homolog 2 ( <i>Madh2</i> )                                                                    | 0064P0014A01     |
| 13 | Activity regulated cytoskeletal-associated protein ( <i>Arc</i> )                                                 | 0065P0027D05     |
| 14 | <b>Similar to formin-like protein (<i>fmln</i>), variant 2</b>                                                    | 0058P0025D01     |
| 15 | <b>Transgelin 2 (<i>Tagln2</i>)</b>                                                                               | 0064P0018E08     |
| 16 | $\beta$ -actin, variant 1                                                                                         | 0061P0009E09     |
| 17 | <b>Cdc42 guanine nucleotide exchange factor 9 (<i>ARHGEF9</i>), variant 1</b>                                     | 0063P0031G05     |
| 18 | Protein kinase, cAMP-dependent regulatory 1 $\alpha$ ( <i>Prkar1<math>\alpha</math></i> ), variant 3              | 0058P0061C03     |
| 19 | <b>Growth arrest &amp; DNA-damage-inducible 45<math>\beta</math> (<i>Gadd45<math>\beta</math></i>), variant 1</b> | 0061P0027C11     |
| 20 | <b>Heat shock protein 40 (<i>Hsp40</i>)</b>                                                                       | 0058P0018H06     |
| 21 | <b>Heat shock 70kDa protein 8 (<i>Hsp70-8</i>), variant 2</b>                                                     | 0065P0027D04     |
| 22 | <b>Heat shock protein 90<math>\alpha</math> (<i>Hsp90<math>\alpha</math></i>)</b>                                 | 0065P0018D07     |
| 23 | <b>Heat shock protein 25 (<i>Hsp25</i>)</b>                                                                       | 0061P0030G03     |
| 24 | <b>Calcyclin binding protein (<i>Cacybp</i>)</b>                                                                  | 0061P0010H02     |
| 25 | START domain containing 7 ( <i>Stard7</i> ), variant 1                                                            | 0058P0032C10     |
| 26 | Synaptotagmin IV ( <i>Syt4</i> )                                                                                  | 0065P0009F07     |
| 27 | ATPase, H <sup>+</sup> transporting, V1 subunit B, isoform 2 ( <i>Atp6v1b2</i> )                                  | 0061P0014D07     |
| 28 | NADH dehydrogenase (ubiquinone), 1 alpha subcomplex, 5 ( <i>Ndufa5</i> )                                          | 0061P0030A03     |
| 29 | Estrogen receptor binding site associated, antigen, 9 ( <i>Ebag9</i> ), variant 1                                 | 0063P0010C08     |
| 30 | <b>Jun-suppressed chemokine (<i>JSC</i>)</b>                                                                      | 0063P0015E10     |
| 31 | Brain derived neurotrophic factor ( <i>BDNF</i> )                                                                 | 0065P0005E12     |
| 32 | <b>Proenkephalin (<i>Penk</i>)</b>                                                                                | 0064P0014A11     |
| 33 | Similar to NPD014 protein ( <i>sim NPD014</i> ), variant 2                                                        | 0064P0014F06     |
|    | <b>Varied across birds</b>                                                                                        |                  |
| 34 | Heat shock protein 108 ( <i>Hsp108</i> )                                                                          | 0065P0027B02     |
| 35 | Similar to stem cell antigen 2, variant 2                                                                         | 0058P0051B11     |
| 36 | Engulfment and cell motility 1, variant 2                                                                         | 0063P0024G05     |
| 37 | Similar to ribonuclease P                                                                                         | 0058P0022A07     |
| 38 | Vesicle associated membrane protein ( <i>Vamp</i> ), variant 3                                                    | 0058P0035G01     |
| 39 | Splicing factor, arginine/serine-rich 1 ( <i>Sfrs1</i> ), variant 1                                               | 0062P0003B01     |
|    | <b>False Positives:</b>                                                                                           |                  |
| 40 | Heat shock 70kDa protein 5 ( <i>Hsp70-5</i> ), variant 1                                                          | 0058P0059A06     |
| 41 | Similar to corticotropin releasing hormone                                                                        | 0058P0017H12     |
| 42 | Zinc finger, MYND domain containing 11 ( <i>Zmynd11</i> )                                                         | 0065P0026G12     |
| 43 | Synaptosomal associated protein-25 ( <i>Snap25</i> )                                                              | 0064P0015A03     |

Bold texts represent those clones that show concordance of the *in situ* hybridization results with the reanalyzed microarray data using GeneSpring *t* test with a P value cut-off of 0.2.
