# Supplementary material
Source: PubMed Central journal article supplement (PMC1622802)
Supplement: pnas_0607098103_20.pdf [file pnas_0607098103_20.pdf]

Table 6. Proportional representation of singing-regulated genes among the various libraries

| mRNA                            | Clone     | Norm, %     | Subtr, %    | 0061, %     | 0062, %   | 0063, %     | 0064, %   | 0065, %     |
|---------------------------------|-----------|-------------|-------------|-------------|-----------|-------------|-----------|-------------|
| egr-1                           | 1         | 0           | 100         | 0           | 0         | 100         | 0         | 0           |
| c-fos                           | 4         | 100         | 0           | 0           | 0         | 0           | 0         | 0           |
| <b>c-jun, v1</b>                | <b>10</b> | <b>10</b>   | <b>90</b>   | <b>10</b>   | <b>20</b> | <b>40</b>   | 10        | 10          |
| sim junB                        | 1         | 100         | 0           | 0           | 0         | 0           | 0         | 0           |
| <b>Atf4, v1</b>                 | <b>14</b> | <b>0</b>    | <b>100</b>  | <b>36</b>   | 0         | <b>29</b>   | 14        | 21          |
| Hspb1, v2                       | 2         | 0           | 100         | 0           | 0         | 0           | 0         | 100         |
| UbE2v1                          | 2         | 0           | 100         | 100         | 0         | 0           | 0         | 0           |
| <b>HnrpH3, v1</b>               | <b>6</b>  | 33          | 66          | 17          | 0         | 17          | 17        | 17          |
| <b>H3f3B, v1</b>                | <b>11</b> | 45          | 55          | 27          | 0         | 18          | <b>0</b>  | 9           |
| <b>H2AfX</b>                    | <b>10</b> | <b>20</b>   | <b>80</b>   | <b>60</b>   | 0         | <b>0</b>    | <b>0</b>  | 20          |
| <b>Shfdg1</b>                   | 3         | 33          | 66          | 0           | 0         | 0           | 33        | 33          |
| Madh2                           | 1         | 0           | 100         | 0           | 0         | 0           | 100       | 0           |
| Arc                             | 1         | 0           | 100         | 0           | 0         | 0           | 0         | 100         |
| Fmn1, v2                        | 1         | 100         | 0           | 0           | 0         | 0           | 0         | 0           |
| Tagln2                          | 1         | 0           | 100         | 0           | 0         | 0           | 100       | 0           |
| $\beta$ -actin                  | 3         | 0           | 100         | 66          | 0         | 0           | 0         | 33          |
| ARHGEF9                         | 3         | 0           | 100         | 33          | 0         | 66          | 0         | 0           |
| Prkar1 $\alpha$ , □□            | 2         | 50          | 50          | 0           | 0         | 0           | 0         | 50          |
| Gadd45 $\beta$ , □□             | 1         | 0           | 100         | 100         | 0         | 0           | 0         | 0           |
| Hsp40                           | 3         | 66          | 33          | 33          | 0         | 0           | 0         | 0           |
| <b>Hsp70-8, v2</b>              | <b>20</b> | <b>50</b>   | <b>50</b>   | <b>5</b>    | <b>20</b> | 10          | 5         | 10          |
| <b>Hsp90<math>\alpha</math></b> | <b>32</b> | <b>0</b>    | <b>100</b>  | 22          | 0         | <b>31</b>   | <b>22</b> | <b>25</b>   |
| <b>Hsp25</b>                    | <b>13</b> | 46          | 54          | <b>54</b>   | 0         | <b>0</b>    | <b>0</b>  | <b>0</b>    |
| <b>Cacybp</b>                   | <b>12</b> | 42          | 58          | <b>33</b>   | 0         | 8           | 8         | 8           |
| Stard7, v1                      | 4         | 100         | 0           | 0           | 0         | 0           | 0         | 0           |
| Syt4                            | 1         | 0           | 100         | 0           | 0         | 0           | 0         | 100         |
| <b>Atp6v1b2</b>                 | <b>10</b> | 40          | 60          | 20          | 0         | 10          | <b>20</b> | 10          |
| Ndufa5                          | 2         | 50          | 50          | 50          | 0         | 0           | 0         | 0           |
| Ebag9                           | 5         | 80          | 20          | 0           | 0         | 20          | 0         | 0           |
| <b>JSC</b>                      | <b>8</b>  | <b>0</b>    | <b>100</b>  | <b>12.5</b> | 0         | <b>62.5</b> | 12.5      | <b>12.5</b> |
| BDNF                            | 1         | 0           | 100         | 0           | 0         | 0           | 0         | 100         |
| Penk                            | 2         | 50          | 50          | 0           | 0         | 0           | 50        | 0           |
| <b>sim NPD014, v2</b>           | <b>8</b>  | <b>12.5</b> | <b>87.5</b> | <b>0</b>    | 0         | <b>37.5</b> | <b>25</b> | <b>25</b>   |
| Observed (avg 198), %           |           | <b>31</b>   | <b>69</b>   | 21          | 1         | 14          | 13        | 21          |
| Expected if random, %           |           | 41          | 59          | 20          | 3         | 15          | 10        | 12          |
| Total clones                    | 13,269    | 5,413       | 7,856       | 2,608       | 349       | 2,054       | 1,309     | 1,536       |

Clones: number of mRNA/cDNA clones from each gene in the database among 13,269 clones with good sequence quality in the libraries listed. Percentage is the percent distribution of these clones among normalized (0058) versus subtracted (0061-0065) libraries combined (fourth column) or distribution among the subtracted libraries 0061-0065 individually (fifth and sixth columns). The expected if random percentage is the percentage that is expected to occur if cDNAs were represented randomly among libraries. Red text, mRNAs (subclusters) with  $n = 6$  or more clones in the database. Bold text, Percentage of clones isolated from a given library (left columns) or set of libraries (subtracted or normalized) that had greater than +10% or -10% difference from the expected percentage.
