# Supplementary material
Source: PubMed Central journal article supplement (PMC1622802)

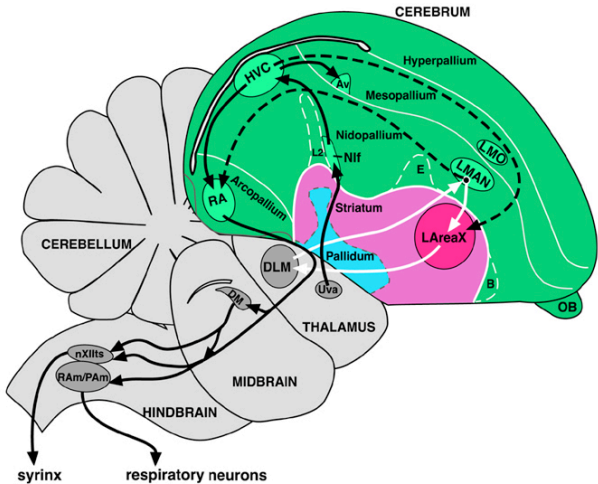

Supplement: pnas_0607098103_1.pdf [file pnas_0607098103_1.pdf]

# Zebra finch

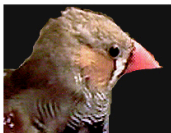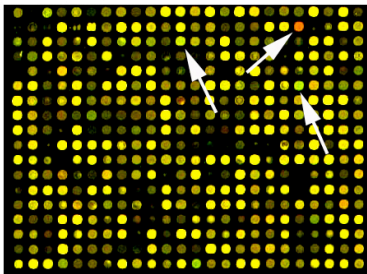

# Canary

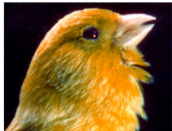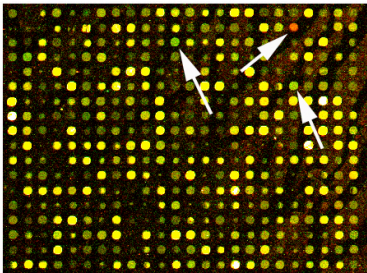

Supplement: pnas_0607098103_11.pdf [file pnas_0607098103_11.pdf]

| Clone:              | A   |    |    |    |    | (M) | B   |    |    |    |    | (M) | C   |    |    |    |    |
|---------------------|-----|----|----|----|----|-----|-----|----|----|----|----|-----|-----|----|----|----|----|
| 1st culturing (hr): | 20  | 8  | 12 | 16 | 20 |     | 20  | 8  | 12 | 16 | 20 |     | 20  | 8  | 12 | 16 | 20 |
| 2nd culturing (hr): | (-) | 20 | 20 | 20 | 20 |     | (-) | 20 | 20 | 20 | 20 |     | (-) | 20 | 20 | 20 | 20 |

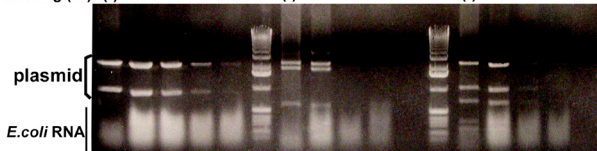

Supplement: pnas_0607098103_14.pdf [file pnas_0607098103_14.pdf]

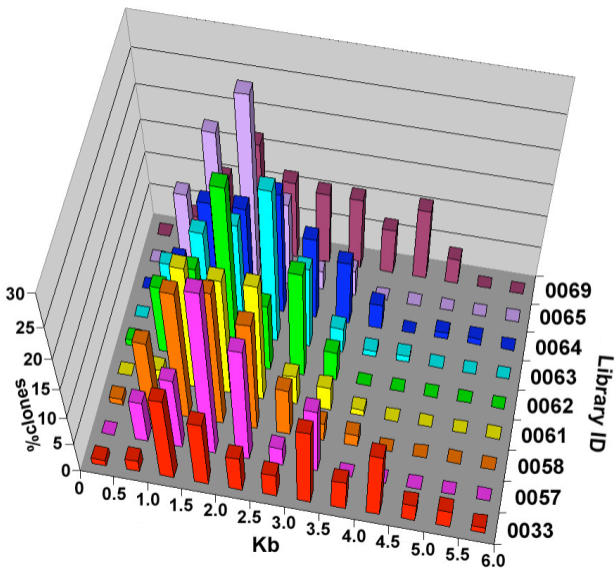

**Fig. S4.** Distribution of cDNA sizes among libraries.

Supplement: pnas_0607098103_4.pdf [file pnas_0607098103_4.pdf]

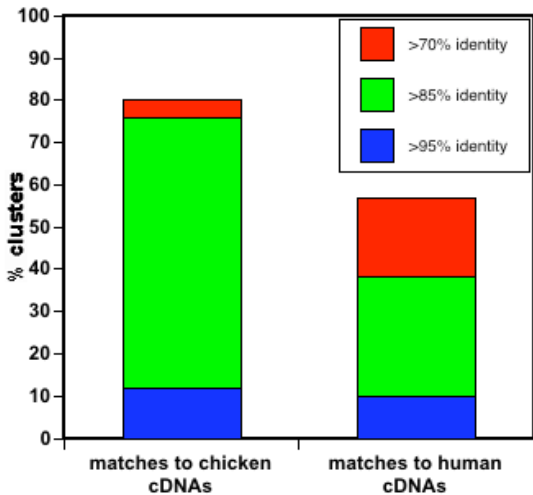

Supplement: pnas_0607098103_6.pdf [file pnas_0607098103_6.pdf]

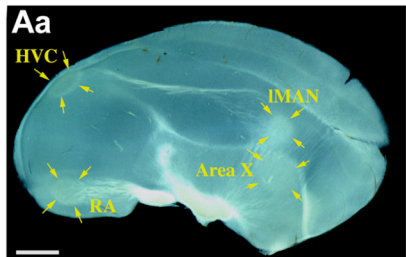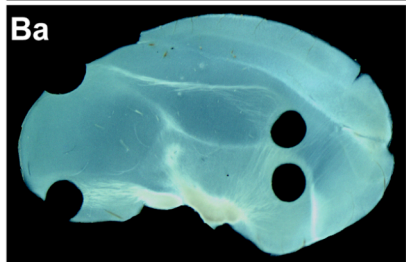

**Ab. Entire brain**  
**Bb. HVC dissected**

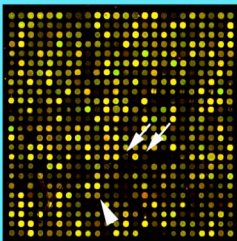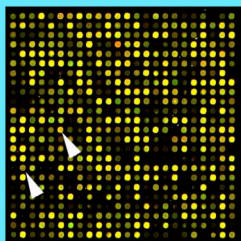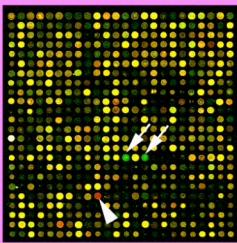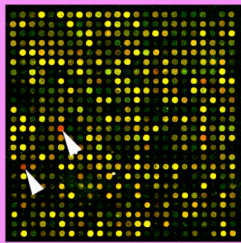

**Singing (red) vs Silent (green)**

**C.**

**Hyb4 HVC IEGs**

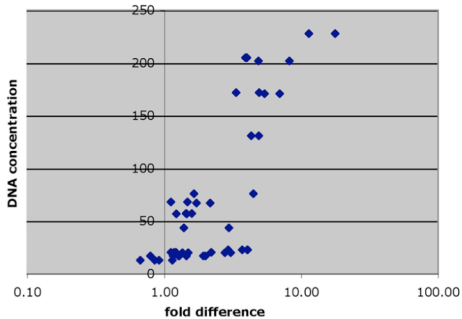

**D.**

**All Hybs HVC scc**

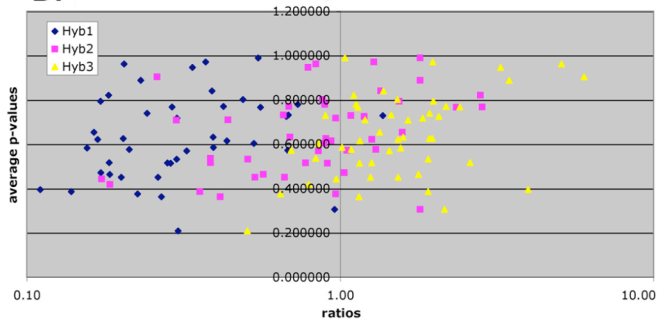

Supplement: pnas_0607098103_7.pdf [file pnas_0607098103_7.pdf]

# splicing factor, arginine/serine-rich 1 (Sfrs1)

silent

0.5h

1h

3h

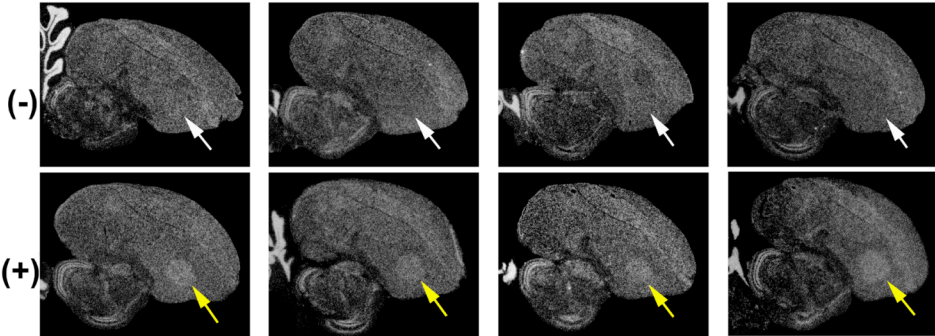

Supplement: pnas_0607098103_8.pdf [file pnas_0607098103_8.pdf]

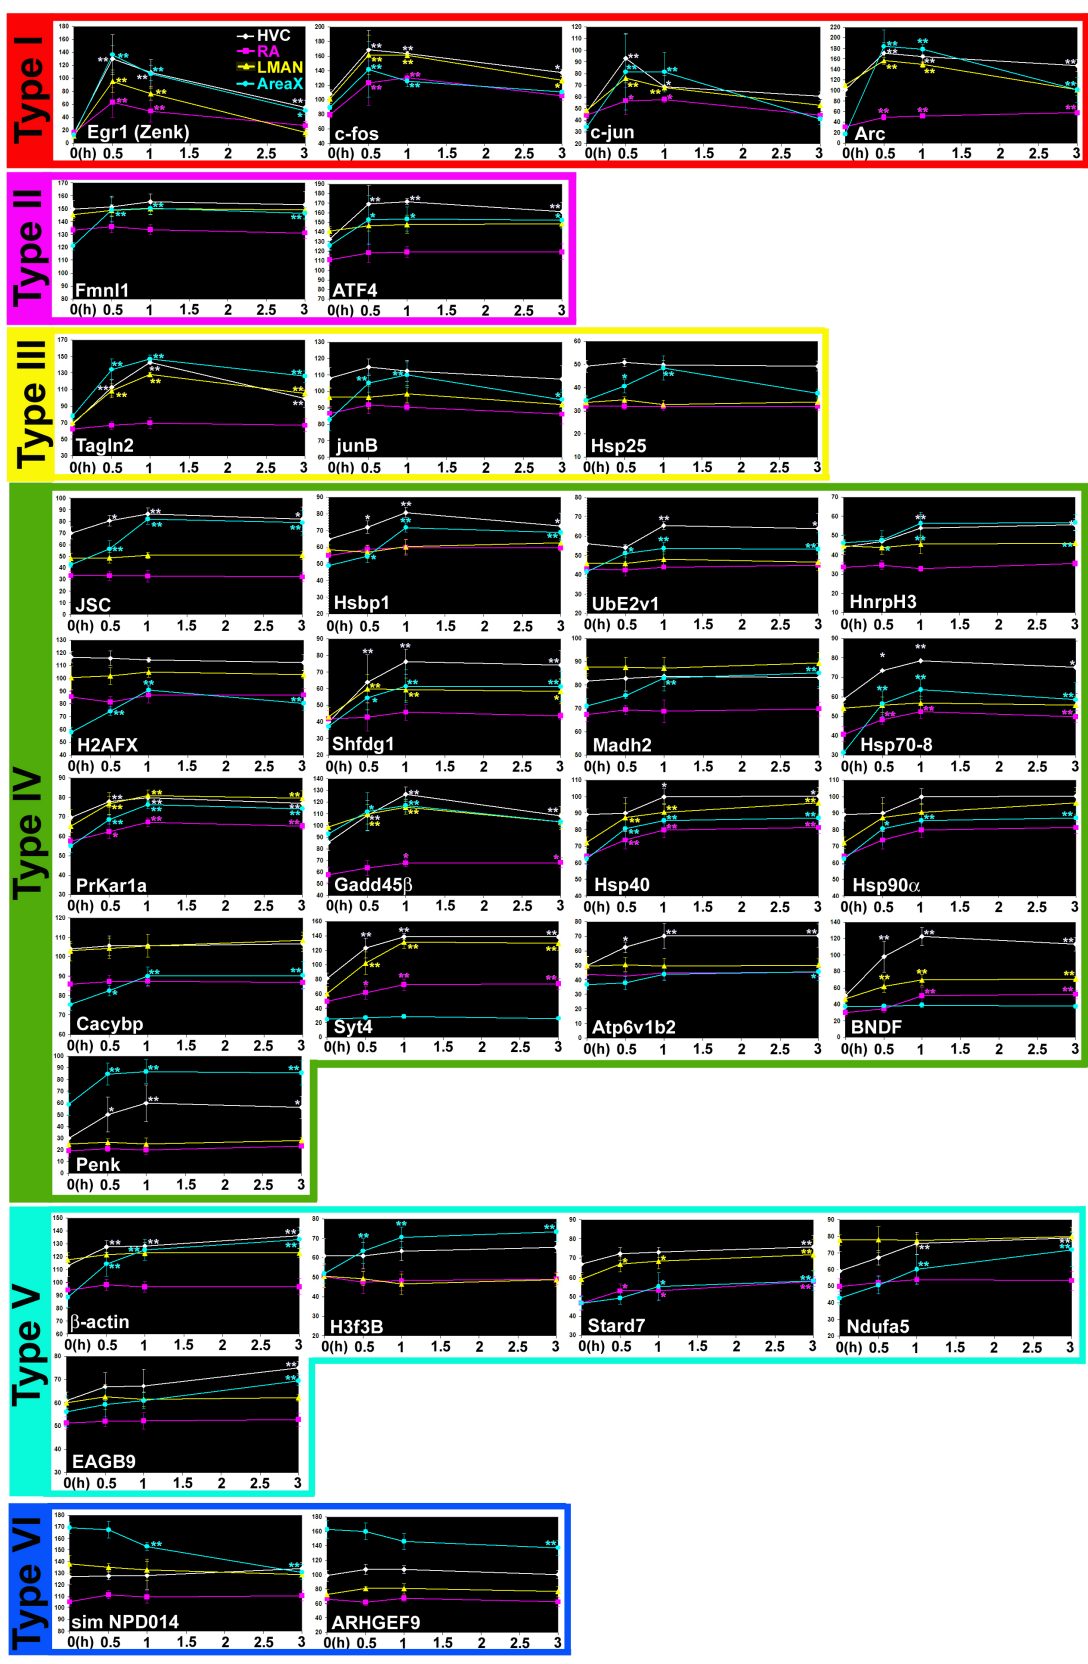

Supplement: pnas_0607098103_9.pdf [file pnas_0607098103_9.pdf]
